# Supplementary material for: Multiple shape memory polymers based on laminates formed from thiol-click chemistry based polymerizations
Source: Royal Society of Chemistry journal article supplement (doi:10.1039/c5sm01260k), 2015-01-01
Supplement: c5sm01260k1.pdf [file c5sm01260k1.pdf]

## Supporting Information

### Multiple Shape Memory Polymers Based on Laminates Formed from Thiol-Click Chemistry Based Polymerizations

Maciej Podgórski,<sup>a,b</sup> Chen Wang<sup>a</sup> and Christopher N. Bowman<sup>a</sup>

<sup>a</sup>Department of Chemical and Biological Engineering, University of Colorado, UCB 596, Boulder, Colorado 80309, United States

<sup>b</sup>Faculty of Chemistry, Department of Polymer Chemistry, Maria Curie-Skłodowska University, pl. Marii Curie-Skłodowskiej 5, 20-031 Lublin, Poland



Fig. S1. DMA second heating profiles showing storage modulus and tangent delta versus temperature for a stoichiometric thiol-isocyanate crosslinking system composed of PETMP and TDI at the molar ratios of 1:2.

(a)



(b)



Fig. S2. Shape recovery cycles within a thiol-X trilayered laminate: (a) bending direction toward layer A; (b) bending direction toward layer C. The laminate composition: layer A – PETMP/HMDI/TDI, layer B – TMPTMP/TMPTA, layer C – PETMP/DVS.
